# Supplementary material
Source: Springer Nature journal article supplement (https://www.springermedizin.de/resource/supplementary/13099_2014_145_MOESM2_ESM.pdf/9665650)

Figure S2

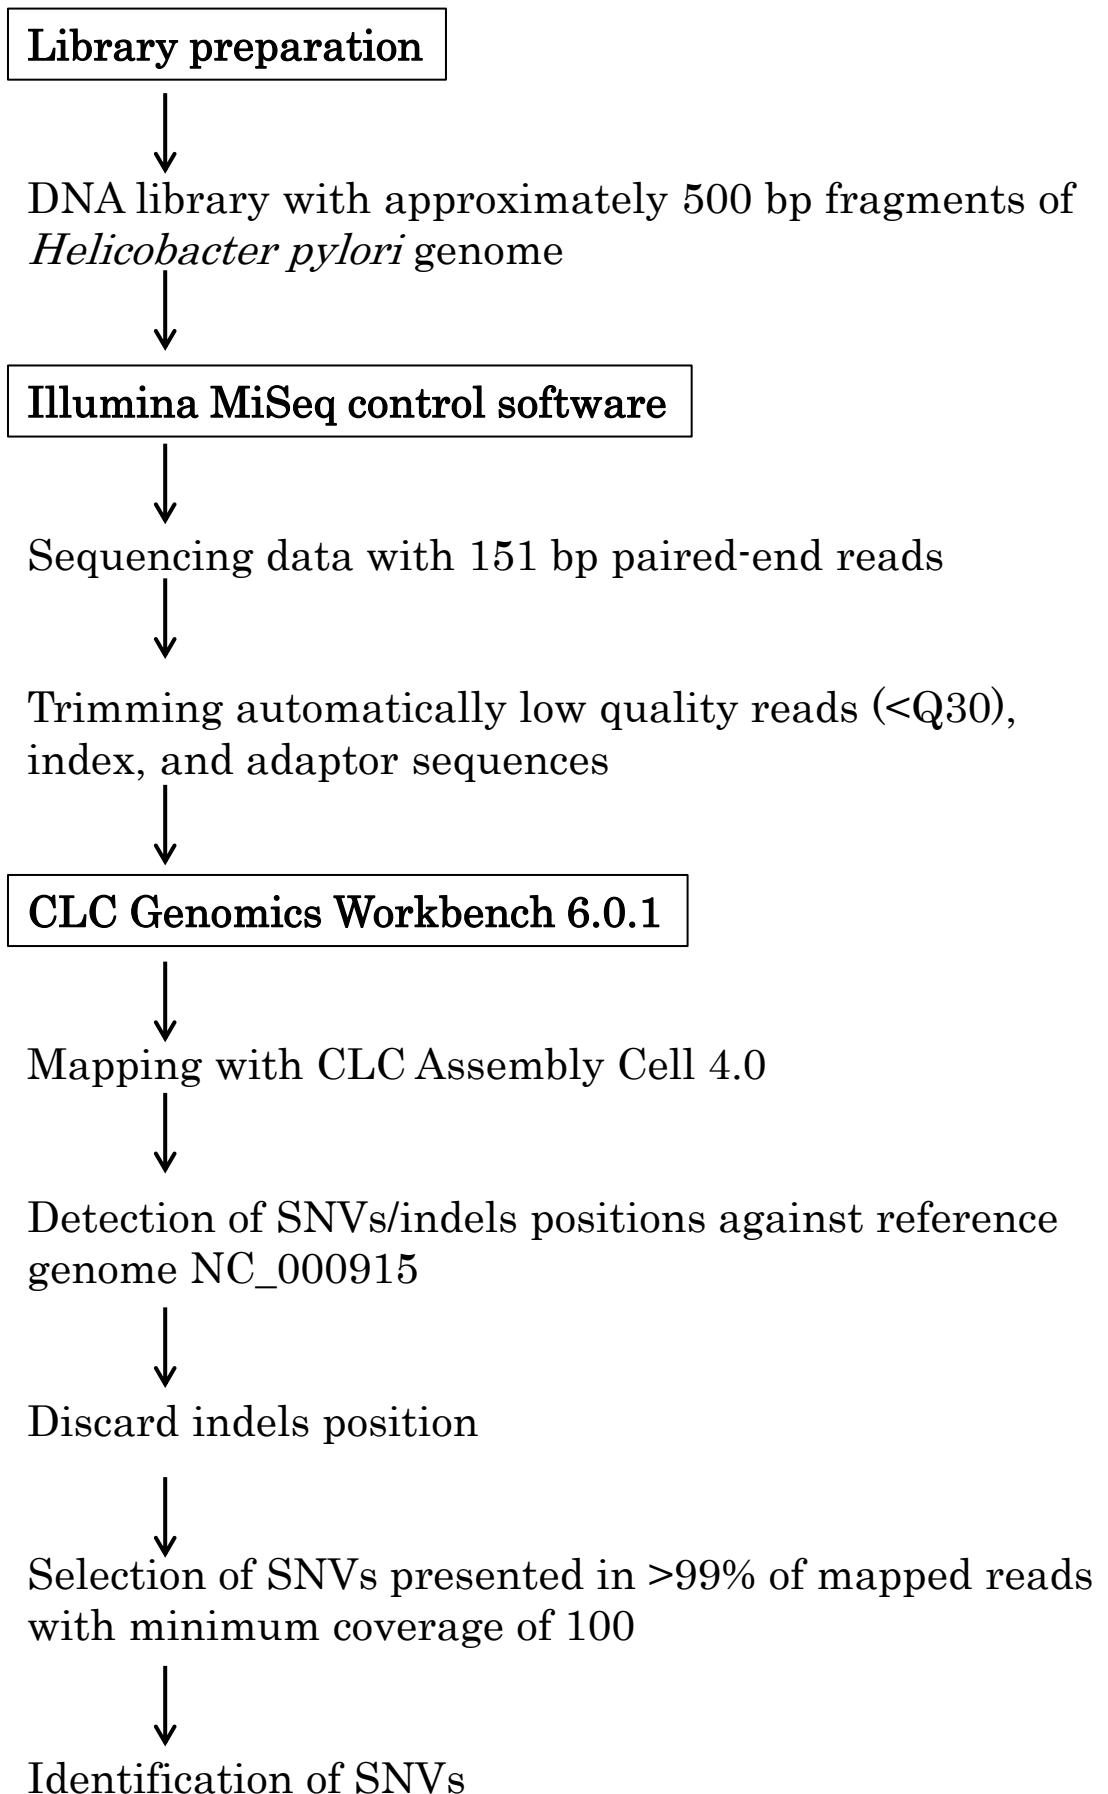

Supplement: MOESM2 [file 9665650]
